# Supplementary material for: Enantioseparation of 1-arylethanols via a supramolecular chiral host consisting of N-(2-naphthoyl)-l-aspartic acid and an achiral diamine
Source: Royal Society of Chemistry journal article supplement (doi:10.1039/c2ob06475h), 2011-12-07
Supplement: c2ob06475h.pdf [file c2ob06475h.pdf]

## Supporting Information

# **Enantioseparation of 1-arylethanols via a supramolecular chiral host consisting of *N*-(2-naphthoyl)-L-aspartic acid and an achiral diamine**

Koichi Kodama\*, Ayaka Kanno, Eriko Sekine and Takuji Hirose\*

*Graduate School of Science and Engineering, Saitama University,*

*255 Shimo-Ohkubo, Sakura, Saitama 338-8570, Japan*

### **Table of Contents**

Copies of <sup>1</sup>H NMR spectra of the reported compounds

S2 – S4

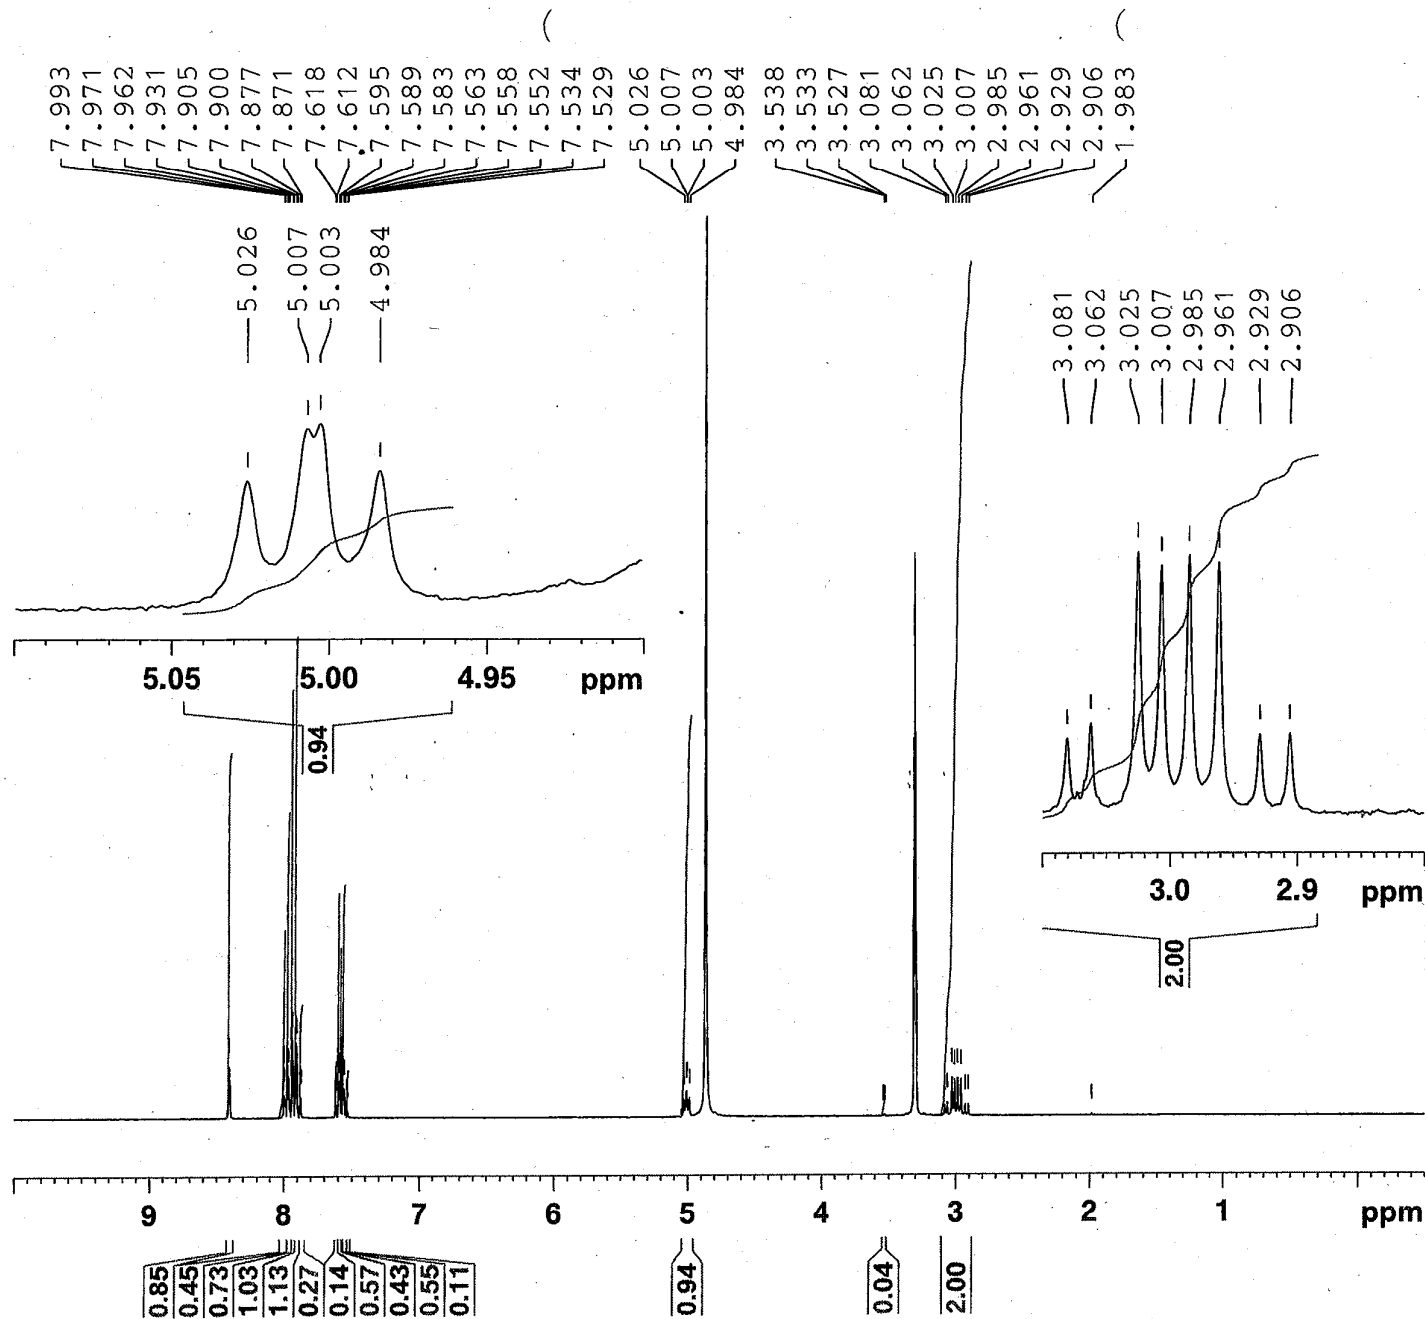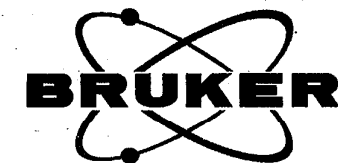

NAME a06ta022aa  
 EXPNO 10  
 PROCNO 1  
 Date\_ 20091208  
 Time 20.02  
 INSTRUM spect  
 PROBHD 5 mm PABBO BB-  
 PULPROG zg30  
 TD 65536  
 SOLVENT MeOD  
 NS 8  
 DS 2  
 SWH 6188.119 Hz  
 FIDRES 0.094423 Hz  
 AQ 5.2953587 sec  
 RG 203  
 DW 80.800 usec  
 DE 6.50 usec  
 TE 298.1 K  
 D1 1.00000000 sec  
 TD0 1

===== CHANNEL f1 =====  
 NUC1 1H  
 P1 15.00 usec  
 PL1 1.20 dB  
 PL1W 8.19348145 W  
 SFO1 300.1318534 MHz  
 SI 32768  
 SF 300.1300067 MHz  
 WDW EM  
 SSB 0  
 LB 0.30 Hz  
 GB 0  
 PC 1.00

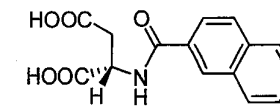

L-1

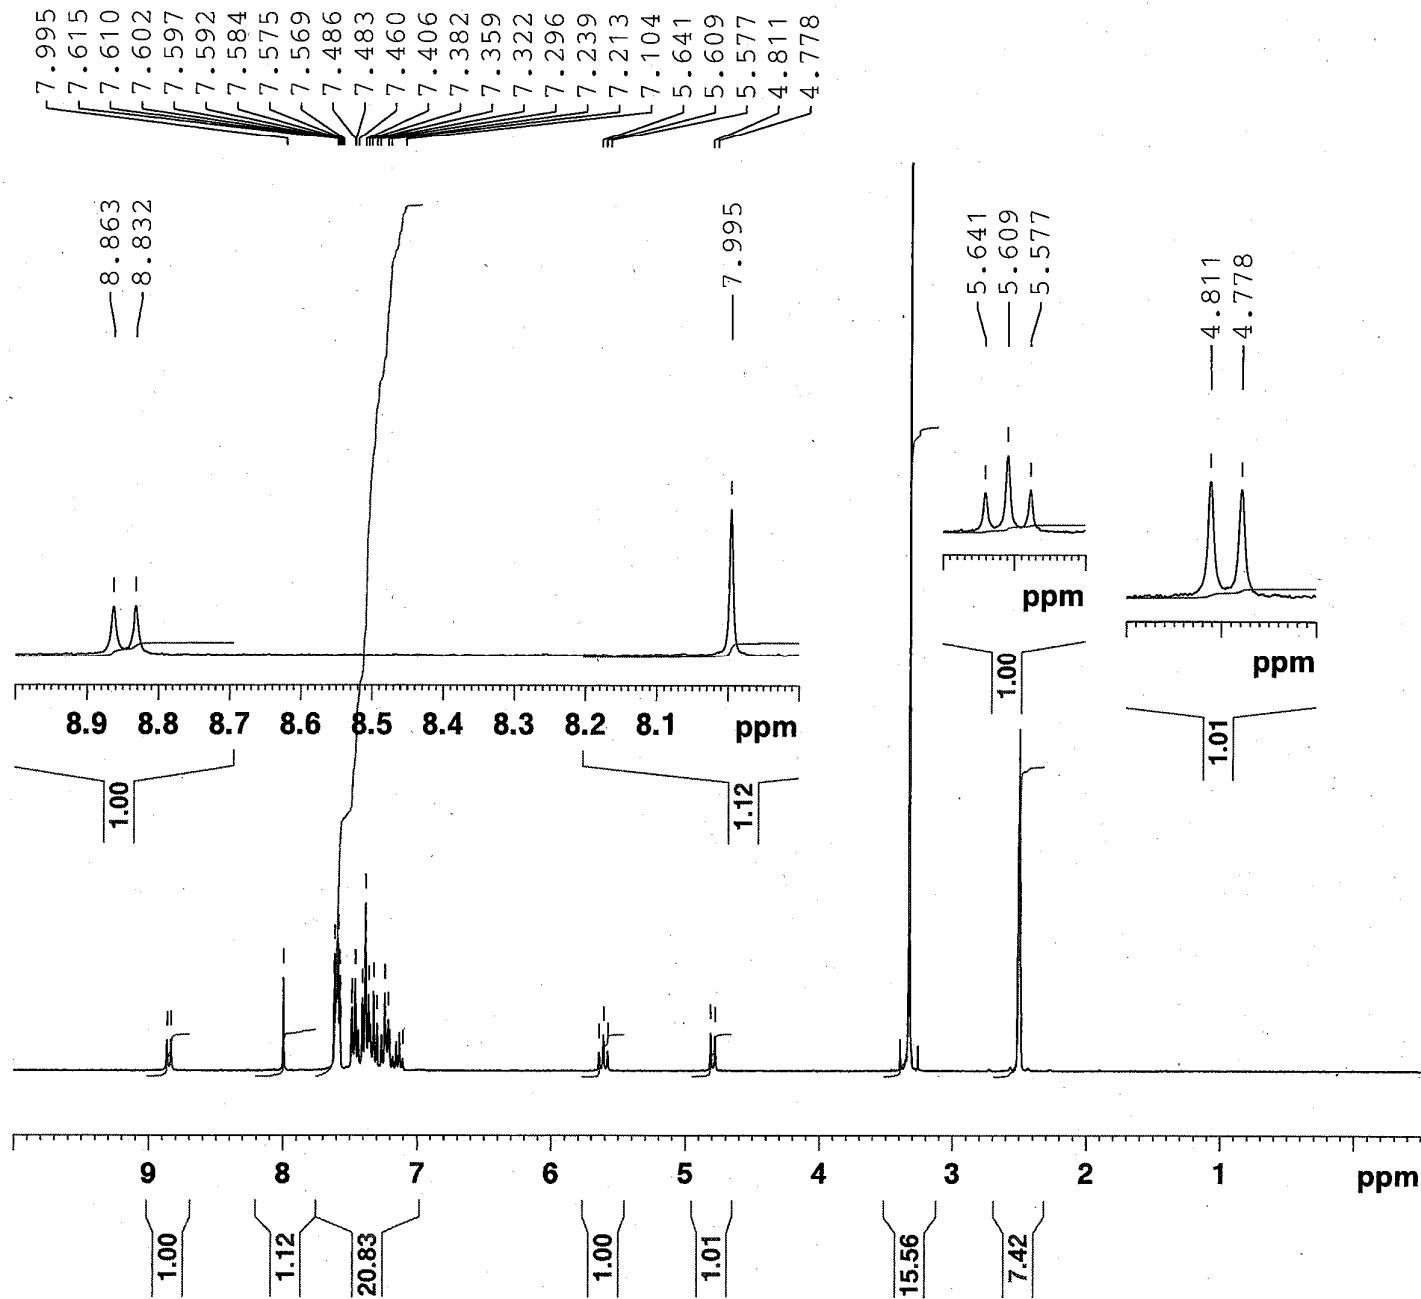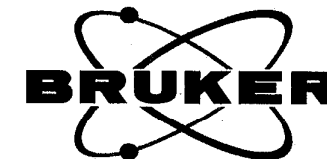

NAME a06ta022aa  
 EXPNO 5  
 PROCNO 1  
 Date\_ 20100226  
 Time 14.03  
 INSTRUM spect  
 PROBHD 5 mm PABBO BB-  
 PULPROG zg30  
 TD 65536  
 SOLVENT DMSO  
 NS 8  
 DS 2  
 SWH 6188.119 Hz  
 FIDRES 0.094423 Hz  
 AQ 5.2953587 sec  
 RG 203  
 DW 80.800 usec  
 DE 6.50 usec  
 TE 297.5 K  
 D1 2.00000000 sec  
 TD0 1

===== CHANNEL f1 =====  
 NUC1 1H  
 P1 15.00 usec  
 PL1 1.20 dB  
 PL1W 8.19348145 W  
 SFO1 300.1318534 MHz  
 SI 32768  
 SF 300.1300000 MHz  
 WDW EM  
 SSB 0  
 LB 0.30 Hz  
 GB 0  
 PC 1.00

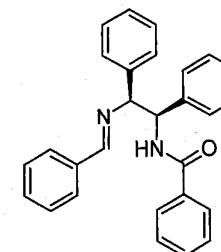

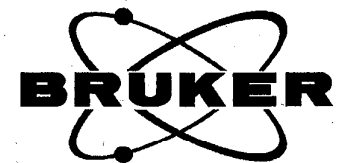

NAME a06ta022aa  
EXPNO 27  
PROCNO 1  
Date\_ 20100108  
Time 11.34  
INSTRUM spect  
PROBHD 5 mm PABBO BB-  
PULPROG zg30  
TD 65536  
SOLVENT MeOD  
NS 8  
DS 2  
SWH 6188.119 Hz  
FIDRES 0.094423 Hz  
AQ 5.2953587 sec  
RG 161  
DW 80.800 usec  
DE 6.50 usec  
TE 297.5 K  
D1 2.00000000 sec  
TD0 1

===== CHANNEL f1 =====  
NUC1 1H  
P1 15.00 usec  
PL1 1.20 dB  
PL1W 8.19348145 W  
SFO1 300.1318534 MHz  
SI 32768  
SF 300.1300048 MHz  
WDW EM  
SSB 0  
LB 0.30 Hz  
GB 0  
PC 1.00

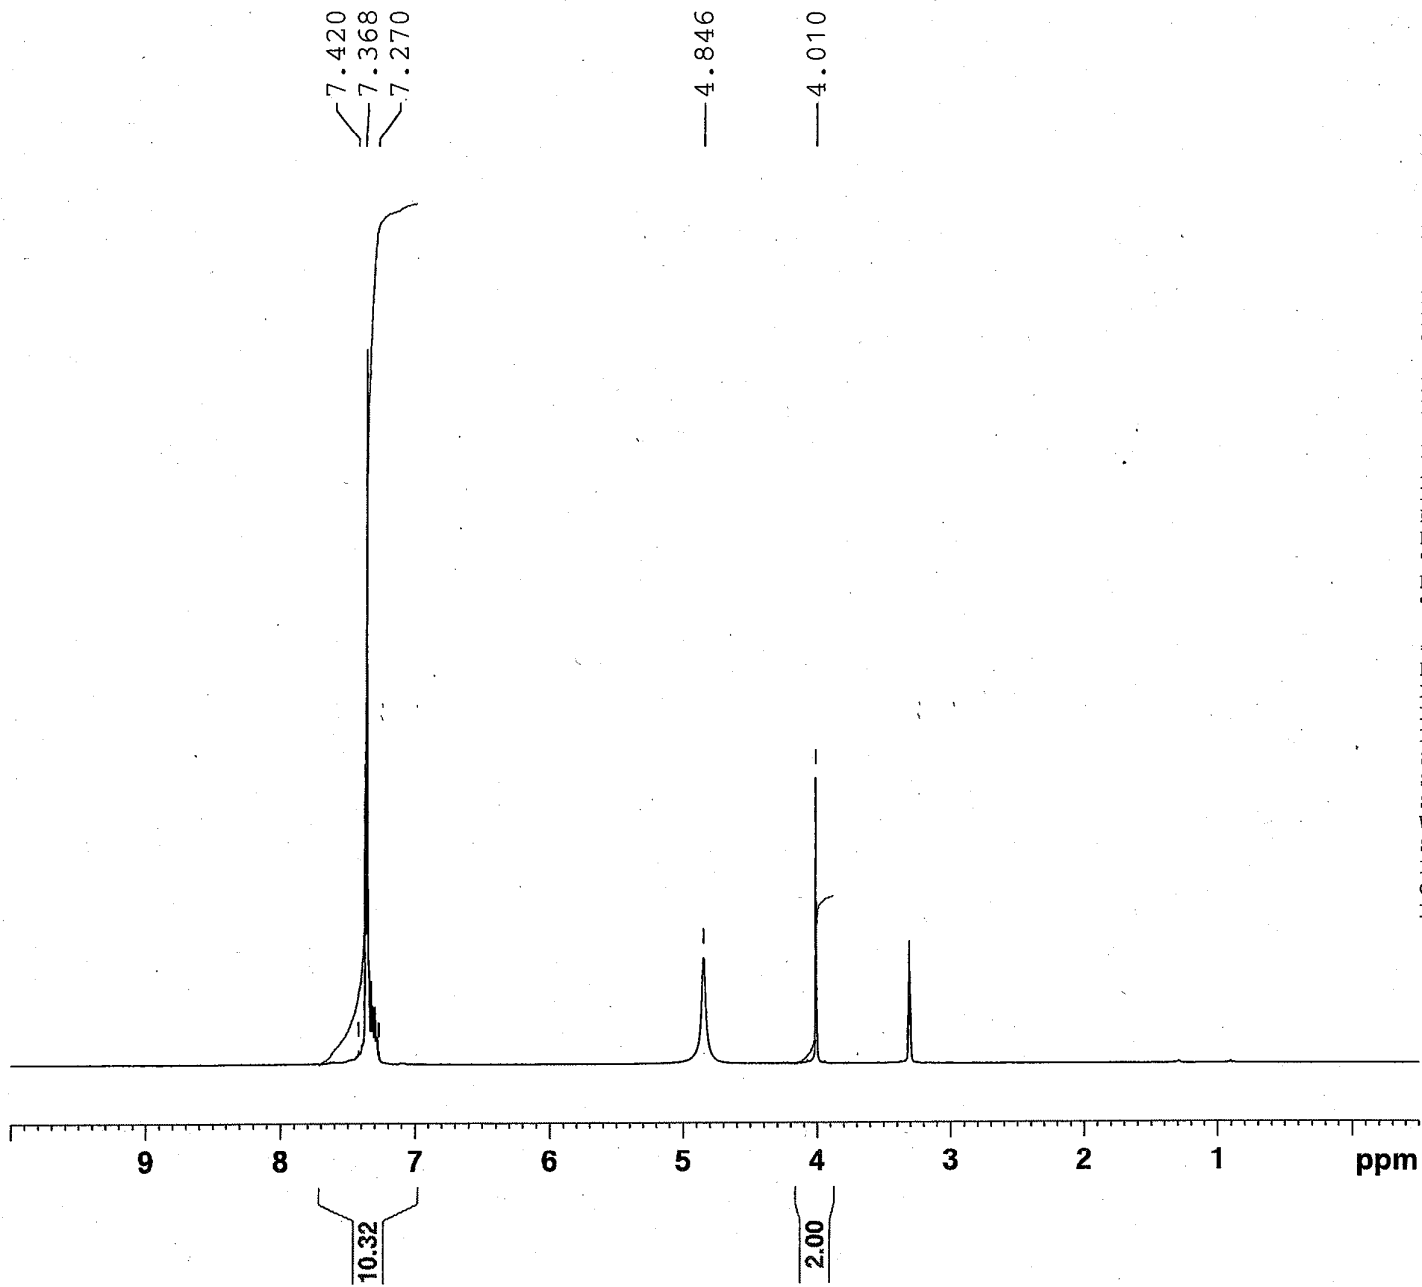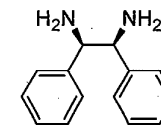

2
